# Supplementary material
Source: PubMed Central journal article supplement (PMC3495401)
Supplement: 1471-2105-13-99-S2.pdf [file 1471-2105-13-99-S2.pdf]

Supplement table 2. Bioinformatics databases that were queried for identified metabolites.

| Database         | Underlying principle                     | Approximate total metabolites |
|------------------|------------------------------------------|-------------------------------|
| KEGG RPAIR       | Atomic mapping                           | 6000                          |
| KEGG REACTION    | Enzymes and non- Enzymatic reactions     | 6000                          |
| KEGG PATHWAY     | Metabolic Pathway                        | 6000                          |
| KEGG LIGAND      | Chemical compounds                       | 20000                         |
| PubChem          | Chemical compounds                       | 40 million                    |
| HumanCyc         | Enzymatic reaction and pathway           | 900                           |
| Reactome         | Biochemical Reaction, Literature curated | 600                           |
| EHMN             | Reconstructed Metabolic network          | 3000                          |
| BIGG-UCSD        | Reconstructed Metabolic network          | 1100                          |
| ChEBI            | Chemical compounds                       | 55000                         |
| MetaCyc compound | Chemical compounds                       | 8000                          |
| MetaCyc reaction | Metabolic reaction                       | 6000                          |
| MetaCyc pathway  | Metabolic pathway                        | 6000                          |
| HMDB             | Human Specific Metabolites               | 8000                          |
