# Supplementary material
Source: PubMed Central journal article supplement (PMC3495401)
Supplement: 1471-2105-13-99-S3.pdf [file 1471-2105-13-99-S3.pdf]

Supplement table S3 . A list of web tools for pathway mapping analysis of a list of metabolites associated with KEGG or PubChem Identifiers.

| S.No. | Pathway Mapping Tool | Web Address                                                                                                                   |
|-------|----------------------|-------------------------------------------------------------------------------------------------------------------------------|
| 1     | Pathway Projector    | <a href="http://www.g-language.org/PathwayProjector/">http://www.g-language.org/PathwayProjector/</a>                         |
| 2     | KEGG Atlas-ipath     | <a href="http://pathways.embl.de/">http://pathways.embl.de/</a>                                                               |
| 3     | KEGG color pathway   | <a href="http://www.genome.jp/kegg/tool/color_pathway.html">http://www.genome.jp/kegg/tool/color_pathway.html</a>             |
| 4     | NCBI Bioystems       | <a href="http://www.ncbi.nlm.nih.gov/biosystems">http://www.ncbi.nlm.nih.gov/biosystems</a>                                   |
| 5     | Reactome Skypanter   | <a href="http://reactome.org/cgi-bin/skypainter2">http://reactome.org/cgi-bin/skypainter2</a>                                 |
| 6     | MetExplore           | <a href="http://metexplore.toulouse.inra.fr/metexplore/index.php">http://metexplore.toulouse.inra.fr/metexplore/index.php</a> |
| 7     | SMPDB                | <a href="http://www.smpdb.ca/smpmap">http://www.smpdb.ca/smpmap</a>                                                           |
