# Supplementary material
Source: PubMed Central journal article supplement (PMC3495401)

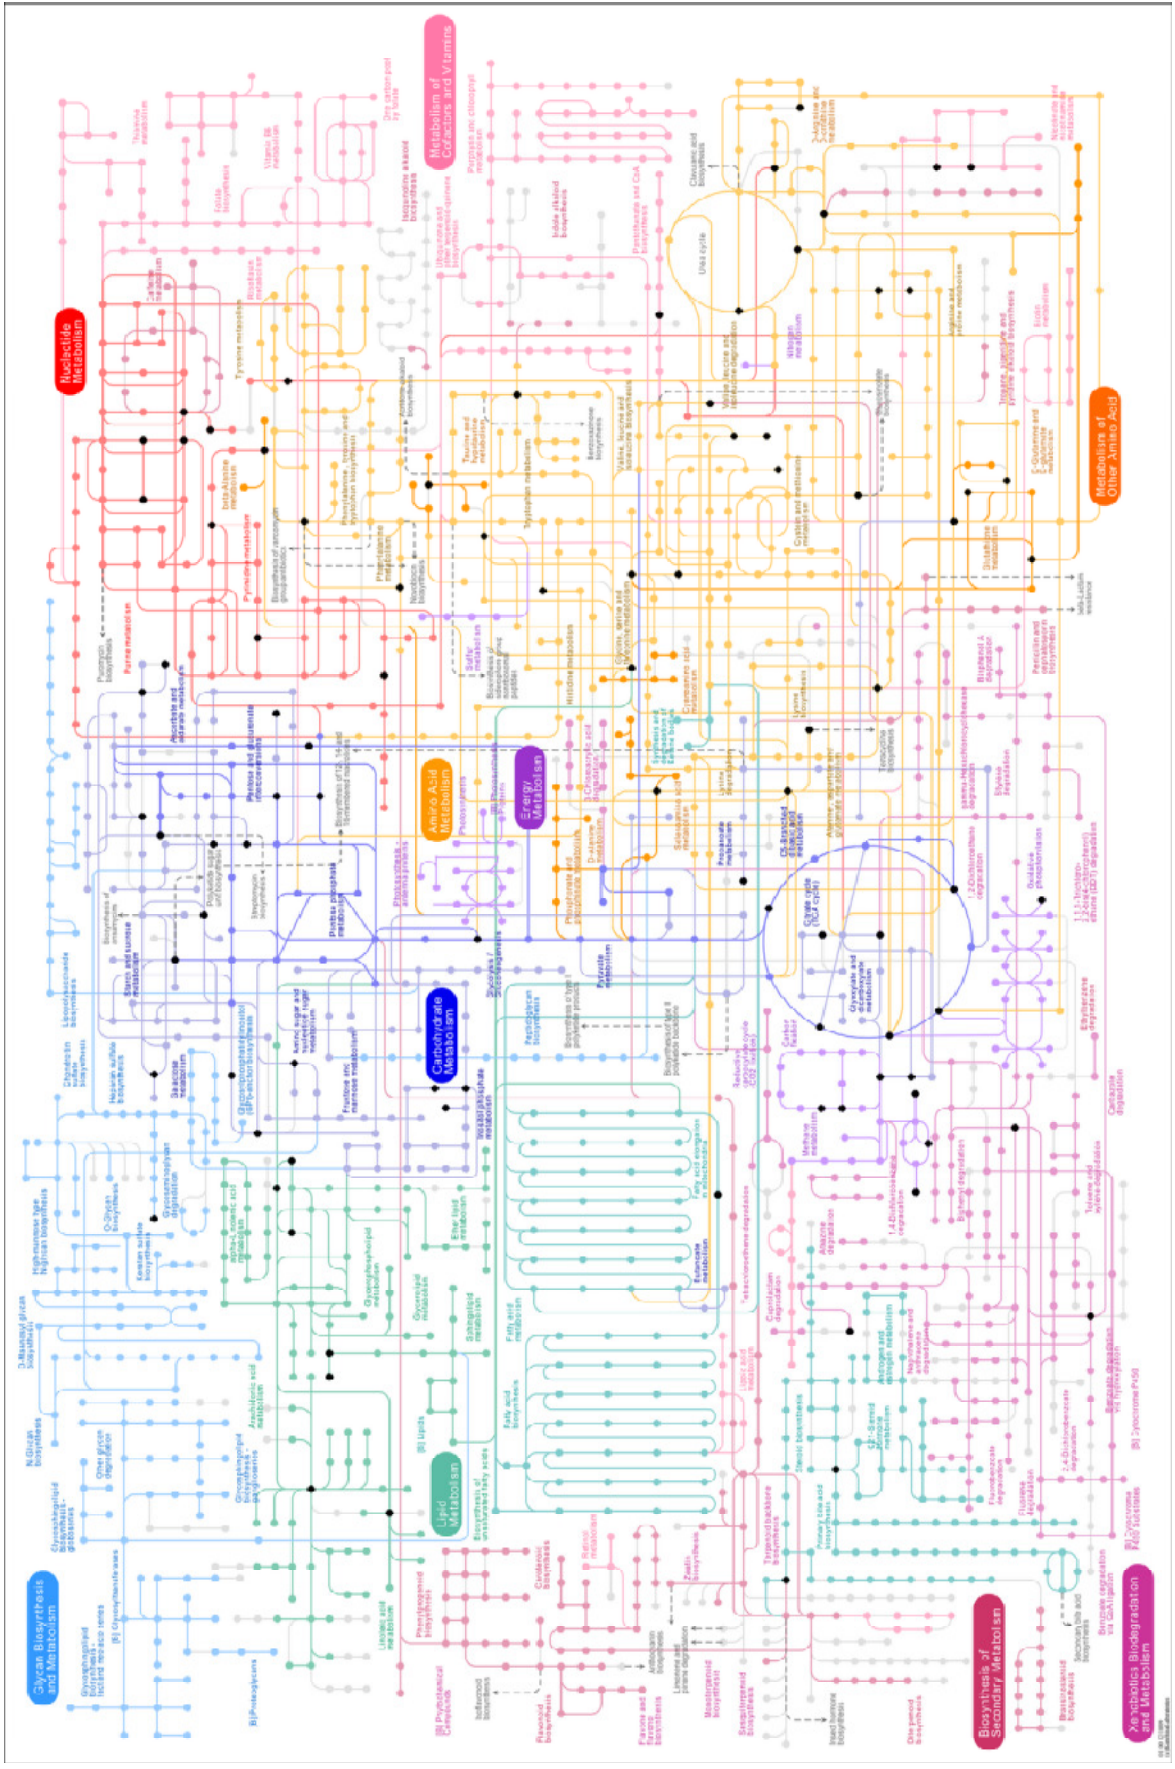

Supplement: 1471-2105-13-99-S4.pdf [file 1471-2105-13-99-S4.pdf]

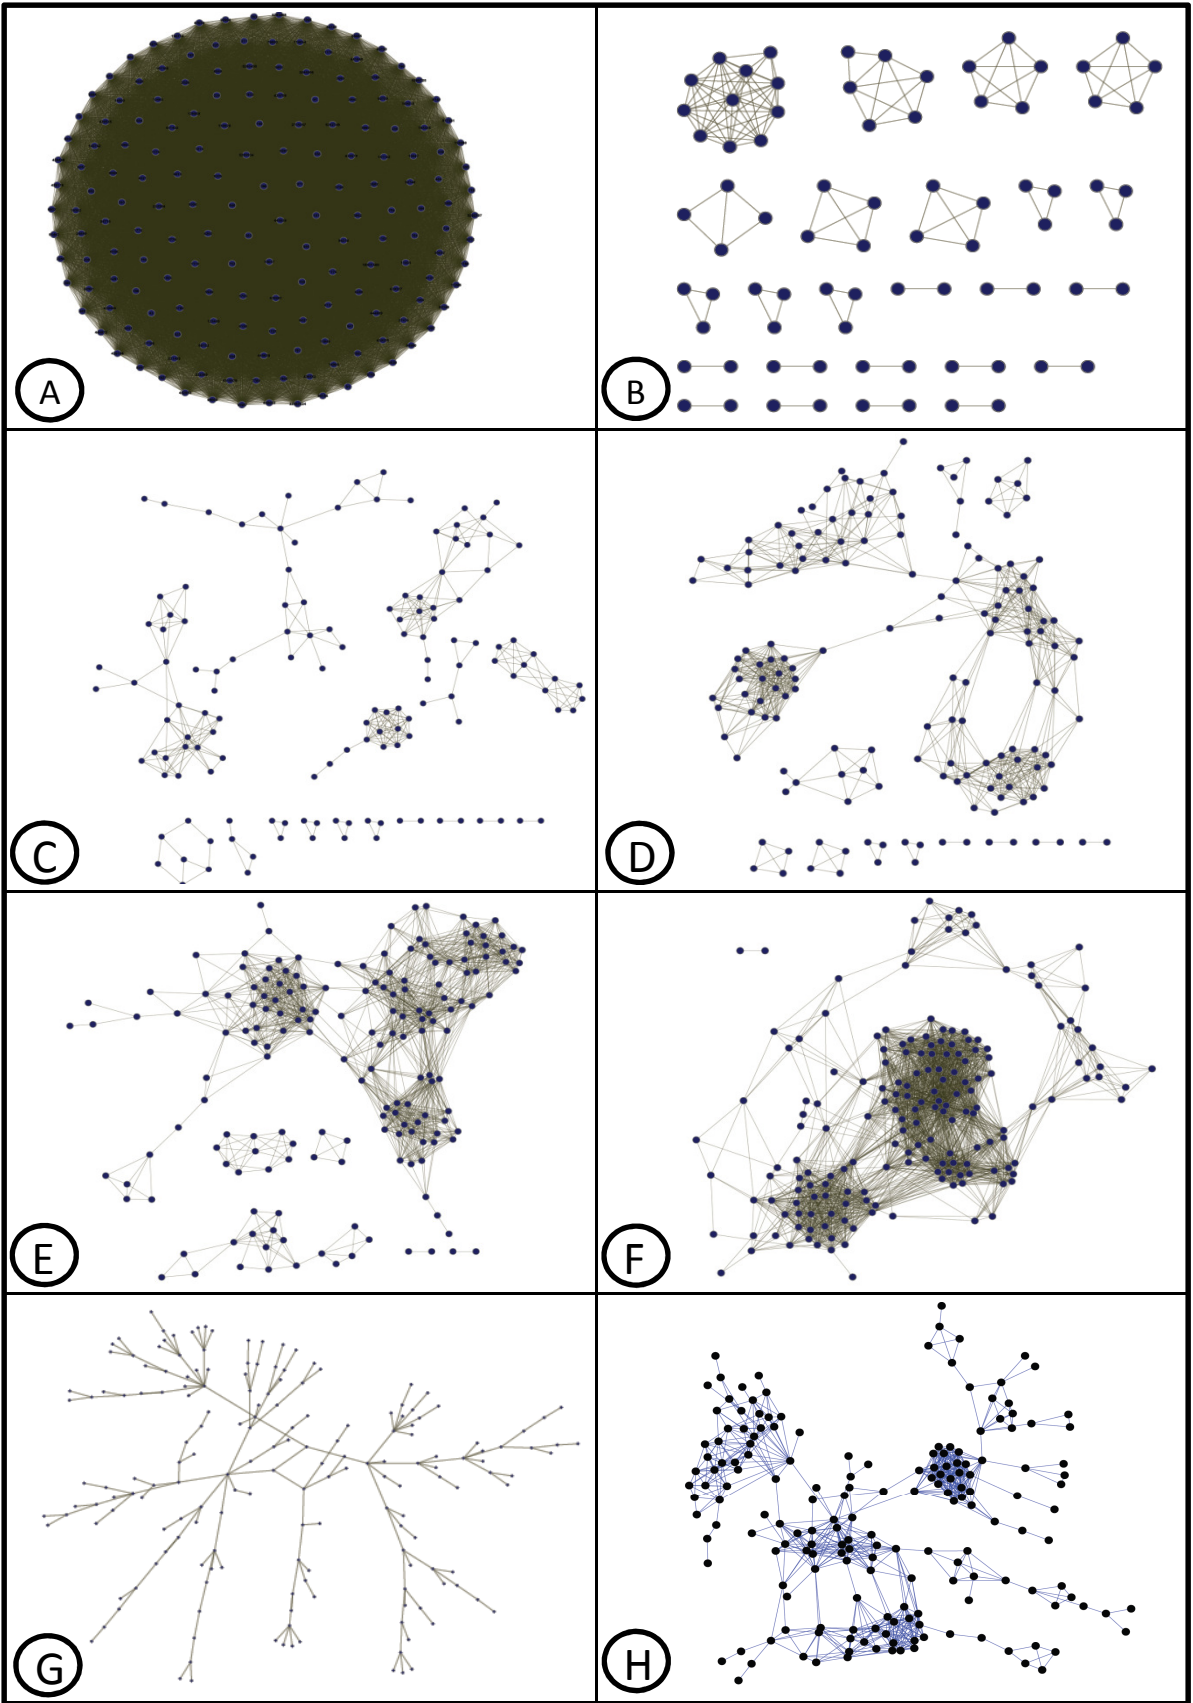

Supplement: 1471-2105-13-99-S6.pdf [file 1471-2105-13-99-S6.pdf]

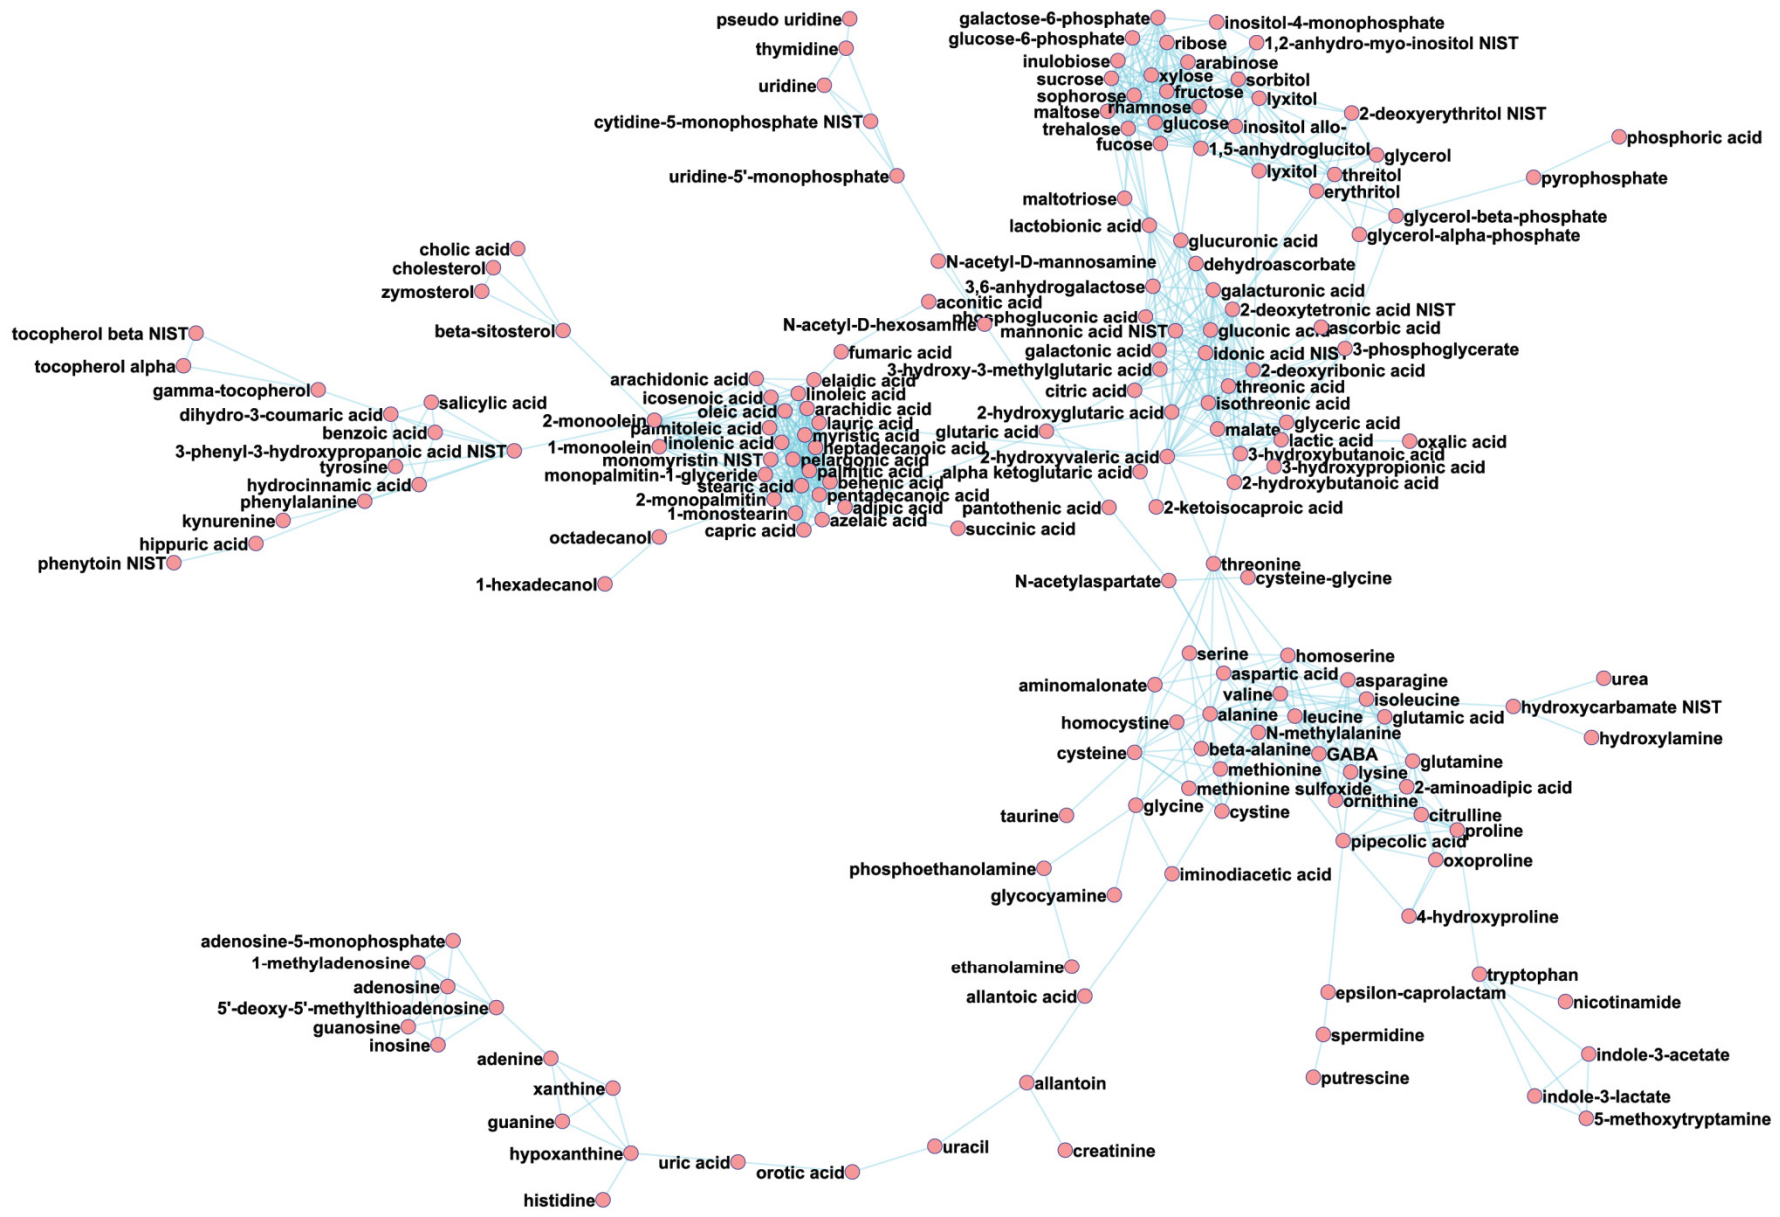

Supplement: 1471-2105-13-99-S7.pdf [file 1471-2105-13-99-S7.pdf]
